# Supplementary material for: The effect of mixed termination composition in Sc, Ti, and V-based MXenes
Source: Royal Society of Chemistry journal article supplement (doi:10.1039/d4cp01397b), 2024-01-01
Supplement: d4cp01397b1.pdf [file d4cp01397b1.pdf]

Supplementary Material to:  
The effect of mixed termination composition in Sc, Ti,  
and V-based MXenes

Michal Novotný\*, Karolína Tkáčová\*, František Karlický\*

August 7, 2024

---

\*Department of Physics, Faculty of Science, University of Ostrava, 30. dubna 22, 701 03 Ostrava, Czech Republic, frantisek.karlicky@osu.cz

# 1 K-point downsampling

While the energy differences may indicate that a  $2 \times 2 \times 1$  grid would be sufficient, this sparse grid produced an indirect band gap of 0.154 eV while denser grids predict the system to be metallic both for PBE and SCAN density functionals. In our methodology, we first pre-converge the wave function using the PBE functional and then use this as a starting point for the SCAN calculation. Using denser k-point grids for PBE has not yielded better results or faster convergence of the SCAN calculations, quite the opposite the reading of the wave function can lead to significant slowdowns with dense k-point grids. We have therefore chosen to use a  $2 \times 2 \times 1$  k-point grid for PBE and  $3 \times 3 \times 1$  grid for SCAN for all subsequent calculations of  $3 \times 3$  cells.

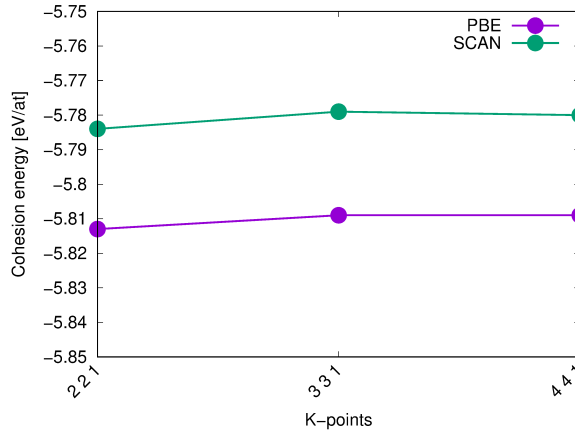

Figure S1: K-point convergence of cohesion energy. The test was performed on a  $3 \times 3$  cell with a mirrored coverage of  $\text{Sc}_2\text{CF}_{0.33}\text{O}_{0.45}(\text{OH})_{0.22}$

# 2 Weighted average lattice constants

Table S1: Evaluation of weighted average (WA) lattice constants compared to relaxed supercells for three distinct Sc-MXene coverages in  $3 \times 3$  supercell. The patterns were mirrored on both sides. The strain was calculated as a ratio of the WA lattice constant to the fully relaxed one. The atomic displacements were calculated as the difference in atomic positions between the WA after atomic relaxation and fully relaxed supercell.

| Coverage                                                            | External pressure [kB] |       | Strain [%] | Largest atomic displacement [Å] |           |       | Cohesion Energy [eV/atom] |        |
|---------------------------------------------------------------------|------------------------|-------|------------|---------------------------------|-----------|-------|---------------------------|--------|
|                                                                     | Relaxed                | WA    |            | X                               | Y         | Z     | Relaxed                   | WA     |
| <b>Before relaxation of atomic positions</b>                        |                        |       |            |                                 |           |       |                           |        |
| $\text{Sc}_2\text{CF}_{0.33}\text{O}_{0.22}(\text{OH})_{0.45}$      | 1.4                    | -0.75 | -0.27      | 0.116                           | 0.121     | 0.211 | -5.763                    | -5.689 |
| $\text{Sc}_2\text{CF}_{0.33}\text{O}_{0.33}(\text{OH})_{0.34}$      | 0.44                   | -1.7  | -0.35      | 0.075                           | 0.080     | 0.221 | -5.867                    | -5.738 |
| $\text{Sc}_{0.45}\text{CF}_{0.22}\text{O}_{0.33}(\text{OH})_{0.45}$ | 0.06                   | -2.25 | -0.35      | 0.063                           | 0.061     | 0.226 | -5.965                    | -5.827 |
| <b>After relaxation of atomic positions</b>                         |                        |       |            |                                 |           |       |                           |        |
| $\text{Sc}_2\text{CF}_{0.33}\text{O}_{0.22}(\text{OH})_{0.45}$      | 1.4                    | -0.75 | -0.27      | $10^{-5}$                       | $10^{-5}$ | 0.001 | -5.763                    | -5.733 |
| $\text{Sc}_2\text{CF}_{0.33}\text{O}_{0.33}(\text{OH})_{0.34}$      | 0.44                   | -1.7  | -0.35      | $10^{-6}$                       | $10^{-5}$ | 0.001 | -5.867                    | -5.848 |
| $\text{Sc}_{0.45}\text{CF}_{0.22}\text{O}_{0.33}(\text{OH})_{0.45}$ | 0.06                   | -2.25 | -0.35      | $10^{-4}$                       | $10^{-6}$ | 0.002 | -5.965                    | -5.901 |

### 3 MXenes with single type of surface termination

Table S2: Bond dissociation energies for F, O, and OH terminal groups from a  $3 \times 3$   $M_2CTT'$  supercell, where T denotes terminal groups on the top of the MXene and T' on the bottom.  $\mu$  indicates the pre-set magnetic state of the structure with the T-group vacancy.

| Coverage<br>TT' | Dissociated<br>bond | Sc        |           |           | Ti        |           |           | V         |           |           |
|-----------------|---------------------|-----------|-----------|-----------|-----------|-----------|-----------|-----------|-----------|-----------|
|                 |                     | 0 $\mu_B$ | 1 $\mu_B$ | 2 $\mu_B$ | 0 $\mu_B$ | 1 $\mu_B$ | 2 $\mu_B$ | 0 $\mu_B$ | 1 $\mu_B$ | 2 $\mu_B$ |
| FF              | -F                  | -7.78     | -7.46     | -         | -7.78     | -7.46     | -         | -5.64     | -5.18     | -         |
| OF              | -F                  | -7.52     | -6.99     | -7.08     | -7.52     | -6.99     | -7.08     | -6.55     | -6.51     | -6.56     |
| (OH)F           | -F                  | -6.77     | -6.52     | -         | -6.77     | -6.52     | -         | -5.16     | -4.96     | -         |
| OO              | -O                  | -7.18     | -6.85     | -6.82     | -7.18     | -6.85     | -6.82     | -6.83     | -6.69     | -6.63     |
| FO              | -O                  | -6.55     | -6.03     | -         | -6.55     | -6.03     | -         | -5.20     | -5.15     | -         |
| (OH)O           | -O                  | -6.89     | -6.57     | -         | -6.89     | -6.57     | -         | -5.13     | -5.20     | -         |
| (OH)(OH)        | -OH                 | -7.72     | -7.45     | -         | -7.72     | -7.45     | -         | -5.64     | -5.42     | -         |
| F(OH)           | -OH                 | -5.99     | -5.49     | -         | -5.99     | -5.49     | -         | -4.71     | -4.69     | -         |
| O(OH)           | -OH                 | -7.40     | -6.99     | -7.04     | -7.40     | -6.99     | -7.04     | -6.81     | -6.74     | -6.69     |

## 4 MXenes with mixed surface termination

To describe patterns of terminal groups we chose to represent them by a code corresponding to their position on the surface of the MXene going by row from bottom to top and by row from left to right. For recognizability, the (OH) group is represented by the symbol **H**. The positions of t-groups in the pattern code are shown in Fig. S2.

Table S3: Cohesion energies and band gaps of  $3\times 3$   $\text{Sc}_2\text{CT}_2$  with mirrored pattern on both sides but shifted and/or rotated with respect to each other.

| Top pattern<br>123456789 | Bottom pattern<br>123456789 | $E_{coh}$<br>[eV/at] | Gap direct<br>[eV] | Gap indirect<br>[eV] |
|--------------------------|-----------------------------|----------------------|--------------------|----------------------|
| HHOFOOOFF                | HHOFOOOFF                   | -5.7784              | 0                  | 0                    |
|                          | OFFHHOFOO                   | -5.7801              | 0                  | 0                    |
|                          | OHHOFOFOF                   | -5.7786              | 0                  | 0                    |
|                          | OOFHOFHFO                   | -5.7762              | 0                  | 0                    |
| HOHOHFFFF                | HOHOHFFFF                   | -5.7749              | 0                  | 0                    |
|                          | OHFFFFHOH                   | -5.775               | 0                  | 0                    |
|                          | FOHFHOFHF                   | -5.772               | 0                  | 0                    |
|                          | HOHFFFFHO                   | -5.7747              | 0                  | 0                    |
|                          | OHFHOFHFH                   | -5.7722              | 0                  | 0                    |
|                          | FHOFFHFOH                   | -5.7716              | 0                  | 0                    |
|                          | HFFHFOOFH                   | -5.7732              | 0                  | 0                    |
| FHHHHFHFF                | FHHHHFHFF                   | -5.6303              | 0.991              | 0.831                |
|                          | HFFFHHHHF                   | -5.6303              | 0.991              | 0.831                |
|                          | HFHFHHFH                    | -5.6303              | 0.991              | 0.831                |
|                          | HFFHHFFHH                   | -5.6294              | 0.986              | 0.828                |
|                          | HHFHFFFHH                   | -5.6303              | 0.991              | 0.831                |
|                          | FHFHFHHHF                   | -5.6294              | 0.989              | 0.828                |
|                          | HFHFHFHHF                   | -5.6303              | 0.99               | 0.831                |
|                          | HHFFHHFFH                   | -5.6294              | 0.986              | 0.827                |
|                          | FHFFHHHFH                   | -5.6294              | 0.989              | 0.827                |
|                          | FHFHFHFHH                   | -5.6303              | 0.991              | 0.831                |
| HHHFFFFFFF               | HHHFFFFFFF                  | -5.8108              | 1.027              | 0.937                |
|                          | FFFHHHHFF                   | -5.8109              | 1.018              | 0.932                |
|                          | HFFHFFHFF                   | -5.8108              | 1.032              | 0.94                 |
|                          | FFFFFFHHH                   | -5.8109              | 1.034              | 0.94                 |
|                          | FHFFHFFHF                   | -5.8108              | 1.032              | 0.939                |
|                          | FFHFFHFFH                   | -5.8109              | 1.032              | 0.94                 |

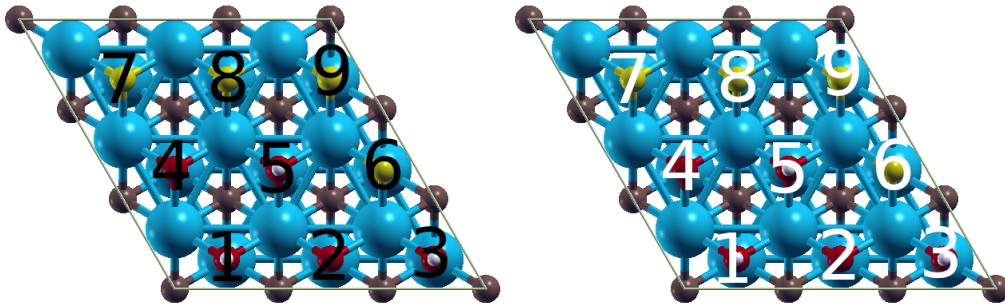

Figure S2: Terminal group positions in the surface pattern.

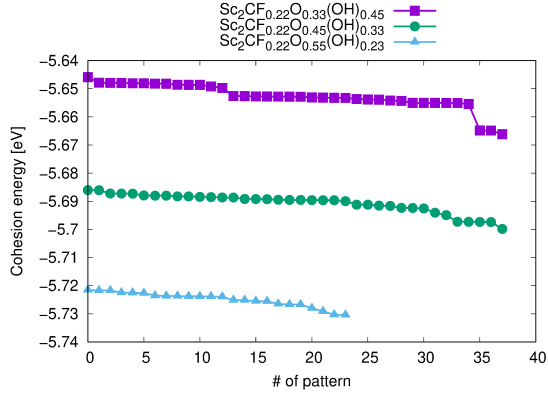

Figure S3: Cohesion energy of specific T-group concentrations with varying chemically distinct patterns.

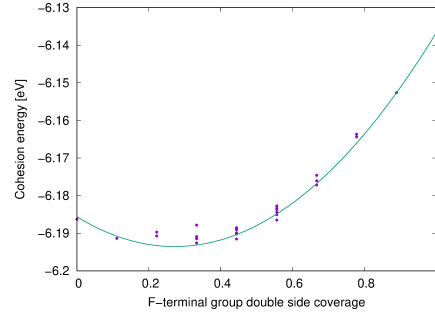

Figure S4: Cohesion energy of  $\text{Sc}_2\text{CF}_{2c}\text{O}_{2(1-c)}$  as a function of single side F-group coverage  $c$ .

Table S4: Cohesion energies of MXenes  $\text{M}_2\text{CTT}'$ , where M/T denotes terminal groups on the top of the MXene and M'/T' on the bottom, with sides fully covered by one terminal group.

| Coverage<br>TT' | $E_{coh}$ [eV/atom] |       |       |
|-----------------|---------------------|-------|-------|
|                 | Sc                  | Ti    | V     |
| FF              | -6.14               | -6.28 | -5.72 |
| OO              | -6.19               | -6.92 | -6.27 |
| OHOH            | -5.34               | -5.51 | -5.14 |
| FO              | -6.13               | -6.57 | -6.00 |
| FOH             | -5.68               | -5.83 | -5.38 |
| OOH             | -5.67               | -6.08 | -5.61 |

## 5 Band structures and band gaps

Figure S5: Atomically resolved band structures of Sc-based MXenes, which embody conductive transition due to the inclusion of O-terminal groups. The Fermi level was set to 0. Red circles correspond to band contributions from Sc atoms, green from F atoms, blue from O atoms in OH, and yellow from O-terminations. The size of the dots corresponds to the spectral contributions of the atomic species to the band as outlined by Popescu et al.<sup>1</sup>

Table S5: Band gap of  $\text{Sc}_2\text{CF}_{2c}(\text{OH})_{2(1-c)}$  as a function of F-group coverage ( $0 \leq c \leq 1$ ) represented as a fraction of the number of F-terminal groups to all available sites. The table shows the process of substituting OH groups by F-terminations on both sides with identical patterns on both sides. We include all available chemically distinct terminal group patterns for a given  $\text{F}_{2c}(\text{OH})_{2(1-c)}$  composition.

| Double-sided<br>F-group coverage | Top pattern<br>123456789 | Bottom pattern<br>123456789 | Gap direct<br>[eV] | Gap indirect<br>[eV] |
|----------------------------------|--------------------------|-----------------------------|--------------------|----------------------|
| 0.00                             | HHHHHHHHH                | HHHHHHHHH                   | 0.499              | 0.499                |
| 0.22                             | FHHHHHHHH                | FHHHHHHHH                   | 0.869              | 0.869                |
| 0.44                             | FFHHHHHHH                | FFHHHHHHH                   | 1.219              | 0.903                |
| 0.44                             | HHHHFHFFF                | HHHHFHFFF                   | 1.211              | 0.906                |
| 0.67                             | FFFHHHHHH                | FFFHHHHHH                   | 1.368              | 0.926                |
| 0.67                             | FHHHFHHHF                | FHHHFHHHF                   | 1.311              | 0.919                |
| 0.67                             | HHHFHHFFF                | HHHFHHFFF                   | 1.359              | 0.920                |
| 0.67                             | HHHHFHFFF                | HHHHFHFFF                   | 1.369              | 0.932                |
| 0.89                             | FFFFHHHHH                | FFFFHHHHH                   | 1.379              | 0.938                |
| 0.89                             | FHHFHFFF                 | FHHFHFFF                    | 1.382              | 0.942                |
| 0.89                             | FHHHFFHFF                | FHHHFFHFF                   | 1.386              | 0.949                |
| 0.89                             | HFHHFFHFF                | HFHHFFHFF                   | 1.376              | 0.942                |
| 0.89                             | HHHFHFHFF                | HHHFHFHFF                   | 1.376              | 0.939                |
| 0.89                             | HHHFFHFFF                | HHHFFHFFF                   | 1.402              | 0.961                |
| 1.11                             | FFFFFHFFF                | FFFFFHFFF                   | 1.404              | 0.961                |
| 1.11                             | FHHHFFHFF                | FHHHFFHFF                   | 1.405              | 0.964                |
| 1.11                             | FHHHFFFFF                | FHHHFFFFF                   | 1.404              | 0.965                |
| 1.11                             | HFHFHFHFF                | HFHFHFHFF                   | 1.413              | 0.976                |
| 1.11                             | HFHHFFFFF                | HFHHFFFFF                   | 1.406              | 0.964                |
| 1.11                             | HHFHFFFFF                | HHFHFFFFF                   | 1.406              | 0.966                |
| 1.33                             | FFFFFHFFF                | FFFFFHFFF                   | 1.442              | 0.996                |
| 1.33                             | FFHFHFHFF                | FFHFHFHFF                   | 1.436              | 0.998                |
| 1.33                             | FHHHFFFFF                | FHHHFFFFF                   | 1.424              | 0.982                |
| 1.33                             | HHFHFFFFF                | HHFHFFFFF                   | 1.439              | 0.996                |
| 1.56                             | FFFFFHHH                 | FFFFFHHH                    | 1.455              | 1.009                |
| 1.56                             | FHFHFFFFF                | FHFHFFFFF                   | 1.462              | 1.017                |
| 1.78                             | FFFFFHHH                 | FFFFFHHH                    | 1.483              | 1.032                |
| 2.00                             | FFFFFFFF                 | FFFFFFFF                    | 1.507              | 1.061                |

Table S6: Band gap of  $\text{Sc}_2\text{CF}_{2c}(\text{OH})_{2(1-c)}$  as a function of F-group coverage ( $0 \leq c \leq 1$ ) represented as a fraction of the number of F-terminal groups to all available sites. The table shows the process of substituting OH groups by F-terminations first on side until saturation and then on the other side. We include all available chemically distinct terminal group patterns for a given  $\text{F}_{2c}(\text{OH})_{2(1-c)}$  composition.

| Double sided<br>F-group coverage | Top pattern<br>123456789 | Bottom pattern<br>123456789 | Gap direct<br>[eV] | Gap indirect<br>[eV] |
|----------------------------------|--------------------------|-----------------------------|--------------------|----------------------|
| 0.00                             | HHHHHHHHH                | HHHHHHHHH                   | 0.499              | 0.499                |
| 0.12                             | HHHHHHHHH                | FHHHHHHHH                   | 0.591              | 0.591                |
| 0.22                             | HHHHFHFFF                | HHHHHHHHH                   | 0.620              | 0.62                 |
| 0.22                             | HHHHHHHHH                | FFHHHHHHH                   | 0.625              | 0.625                |
| 0.34                             | FHHFHFFF                 | HHHHHHHHH                   | 0.651              | 0.651                |
| 0.34                             | HHHFHHFFF                | HHHHHHHHH                   | 0.666              | 0.666                |
| 0.34                             | HHHHFHFFF                | HHHHHHHHH                   | 0.666              | 0.666                |
| 0.34                             | HHHHHHHHH                | FFFHHHHHH                   | 0.657              | 0.657                |
| 0.44                             | FHHFHFFF                 | HHHHHHHHH                   | 0.694              | 0.694                |
| 0.44                             | FHHHHFFF                 | HHHHHHHHH                   | 0.709              | 0.709                |
| 0.44                             | HFHHFHFFF                | HHHHHHHHH                   | 0.697              | 0.697                |
| 0.44                             | HHHFHFFFF                | HHHHHHHHH                   | 0.703              | 0.703                |
| 0.44                             | HHHHFFFFF                | HHHHHHHHH                   | 0.695              | 0.695                |
| 0.44                             | HHHHHHHHH                | FFFFHHHHH                   | 0.693              | 0.693                |
| 0.56                             | FHHFHFFF                 | HHHHHHHHH                   | 0.730              | 0.73                 |
| 0.56                             | FHHHHFFF                 | HHHHHHHHH                   | 0.719              | 0.719                |
| 0.56                             | HFHFHFFFF                | HHHHHHHHH                   | 0.728              | 0.728                |
| 0.56                             | HFHHHFFF                 | HHHHHHHHH                   | 0.734              | 0.734                |
| 0.56                             | HHFHFFF                  | HHHHHHHHH                   | 0.740              | 0.74                 |
| 0.56                             | HHHHHHHHH                | FFFFFHFFF                   | 0.731              | 0.731                |
| 0.66                             | FFHFHFFFF                | HHHHHHHHH                   | 0.786              | 0.786                |
| 0.66                             | FHHHFFF                  | HHHHHHHHH                   | 0.755              | 0.755                |
| 0.66                             | HHFHFFF                  | HHHHHHHHH                   | 0.775              | 0.775                |
| 0.66                             | HHHHHHHHH                | FFFFFHFFF                   | 0.762              | 0.762                |
| 0.78                             | FHFHFFFF                 | HHHHHHHHH                   | 0.814              | 0.814                |
| 0.78                             | HHHHHHHHH                | FFFFFHFFF                   | 0.797              | 0.797                |
| 0.88                             | HHHHHHHHH                | FFFFFHFFF                   | 0.850              | 0.85                 |
| 1.00                             | HHHHHHHHH                | FFFFFHFFF                   | 0.856              | 0.856                |
| 1.12                             | FHHHHHHHH                | FFFFFHFFF                   | 1.208              | 0.979                |
| 1.22                             | FFHHHHHHH                | FFFFFHFFF                   | 1.383              | 0.98                 |
| 1.22                             | HHHHFHFFF                | FFFFFHFFF                   | 1.381              | 0.983                |
| 1.34                             | FFFHHHHHH                | FFFFFHFFF                   | 1.430              | 0.983                |
| 1.34                             | FHHFHFFF                 | FFFFFHFFF                   | 1.442              | 0.99                 |
| 1.34                             | HHHFHHFFF                | FFFFFHFFF                   | 1.432              | 0.986                |
| 1.34                             | HHHHFHFFF                | FFFFFHFFF                   | 1.436              | 0.991                |
| 1.44                             | FFFFFHFFF                | FFFFFHFFF                   | 1.443              | 0.997                |
| 1.44                             | FHHFHFFF                 | FFFFFHFFF                   | 1.450              | 1.002                |
| 1.44                             | FHHHHFFF                 | FFFFFHFFF                   | 1.445              | 1.005                |
| 1.44                             | HFHHFHFFF                | FFFFFHFFF                   | 1.438              | 0.995                |
| 1.44                             | HHHFHFFFF                | FFFFFHFFF                   | 1.444              | 1.001                |
| 1.44                             | HHHHFHFFF                | FFFFFHFFF                   | 1.453              | 1.004                |
| 1.56                             | FFFFFHFFF                | FFFFFHFFF                   | 1.457              | 1.01                 |
| 1.56                             | FHHFHFFF                 | FFFFFHFFF                   | 1.461              | 1.012                |
| 1.56                             | FHHHHFFF                 | FFFFFHFFF                   | 1.458              | 1.011                |
| 1.56                             | HFHFHFFFF                | FFFFFHFFF                   | 1.455              | 1.011                |
| 1.56                             | HFHHHFFF                 | FFFFFHFFF                   | 1.447              | 0.999                |
| 1.56                             | HHFHFFF                  | FFFFFHFFF                   | 1.458              | 1.011                |
| 1.66                             | FFFFFHFFF                | FFFFFHFFF                   | 1.467              | 1.016                |
| 1.66                             | FFHFHFFFF                | FFFFFHFFF                   | 1.464              | 1.024                |
| 1.66                             | FHHHFFF                  | FFFFFHFFF                   | 1.463              | 1.014                |
| 1.66                             | HHFHFFF                  | FFFFFHFFF                   | 1.468              | 1.021                |
| 1.78                             | FFFFFHFFF                | FFFFFHFFF                   | 1.473              | 1.026                |
| 1.78                             | FHFHFFFF                 | FFFFFHFFF                   | 1.477              | 1.034                |
| 1.88                             | FFFFFHFFF                | FFFFFHFFF                   | 1.489              | 1.042                |
| 2.00                             | FFFFFHFFF                | FFFFFHFFF                   | 1.507              | 1.061                |

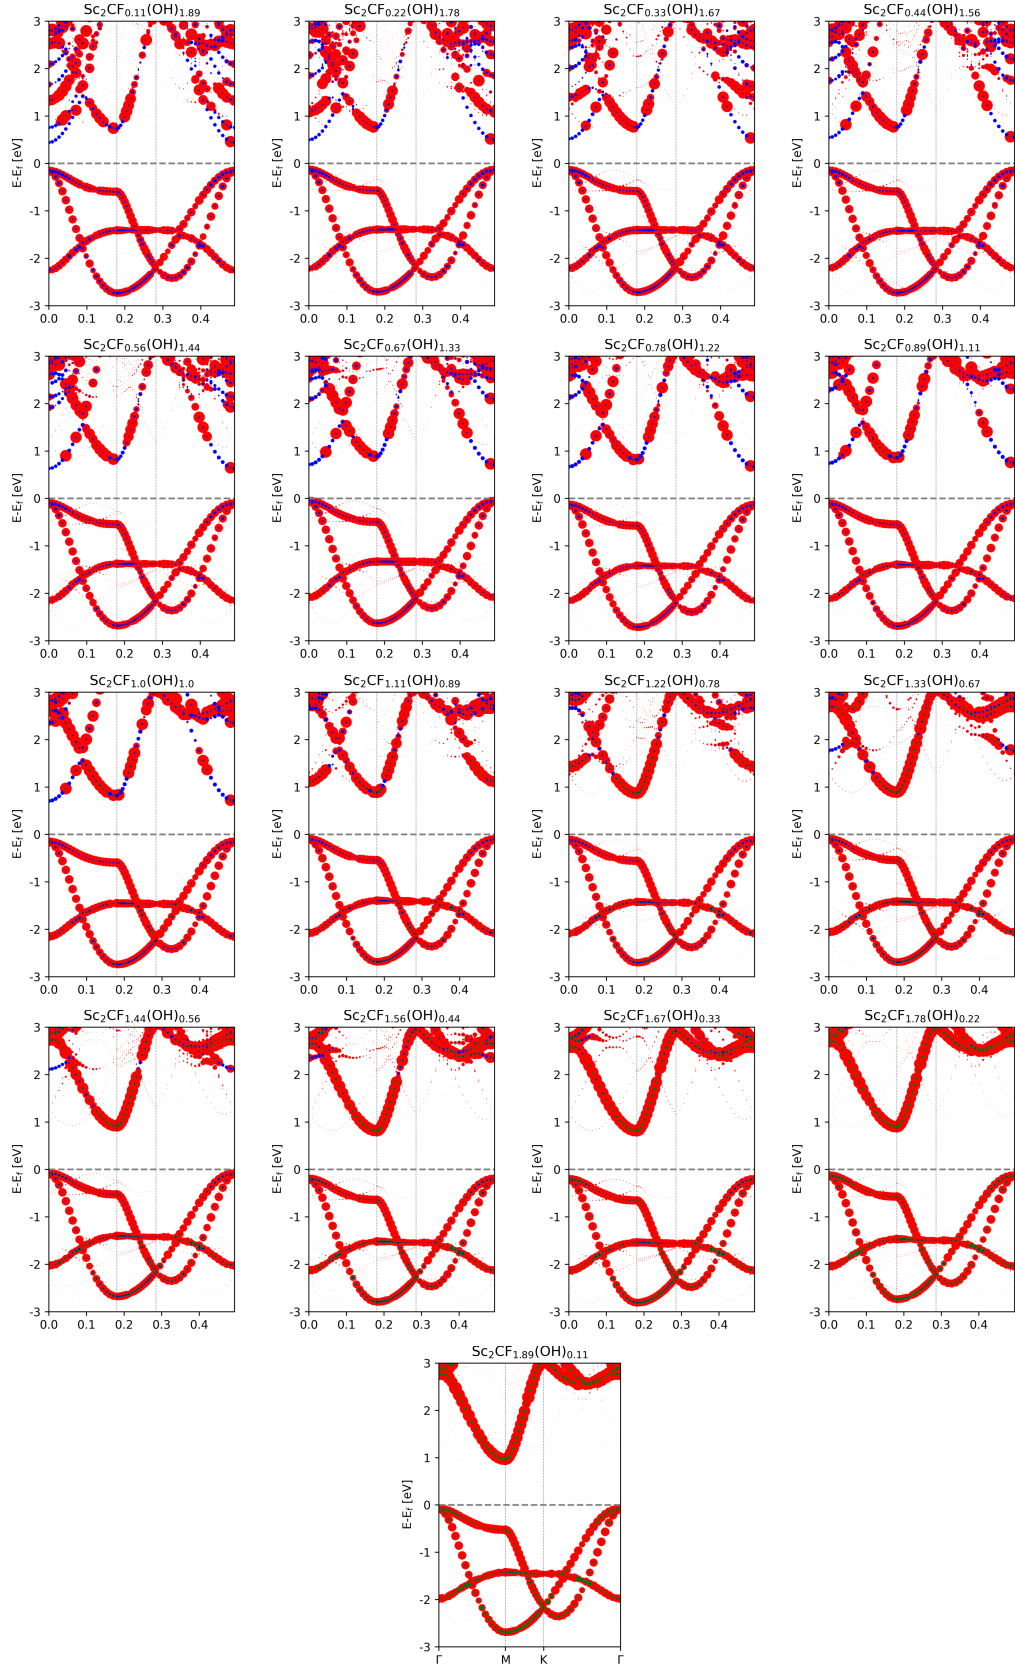

Figure S6: Band structures of Sc-based MXenes. Details as in Figure 4 of the main text.



## References

1. V. Popescu and A. Zunger, *Physical Review B*, 2012, **85**, 085201.
